# Supplementary material for: Biomarkers for diagnosis of sepsis in patients with systemic inflammatory response syndrome: a systematic review and meta-analysis
Source: PubMed Central journal article supplement (PMC5153391; doi:10.1186/s40064-016-3591-5), 2016-12-12
Supplement: 40064_2016_3591_MOESM1_ESM.pdf [file 40064_2016_3591_MOESM1_ESM.pdf]

## S1: Characteristics of the included studies.

| Reference        | Year   | Admission category   | Location    | n   | Age, | Reference | Year | Admission category                         | Location                      |
|------------------|--------|----------------------|-------------|-----|------|-----------|------|--------------------------------------------|-------------------------------|
| Abidi            | 2008   | medical              | Morocco     | 140 | 43   | 59        | 86   | CRP                                        | ---                           |
| Ahmadinejad      | 2009   | medical and surgical | Iran        | 120 | 60   | 49        | 59   | PCT                                        | No information                |
| Al-Nawas         | 1996   | medical              | Germany     | 337 | ---  | ---       | 36   | PCT                                        | SSS                           |
| Anand            | 2015 A | ---                  | India       | 136 | 51   | 61        | 66   | PCT, IL-6                                  | SSS                           |
| Anand            | 2015 B | ---                  | India       | 118 | 51   | 62        | 61   | PCT, IL-6                                  | SSS                           |
| Balc             | 2003   | medical and surgical | Turkey      | 83  | 58   | 52        | 42   | PCT, CRP, IL-6, IL-8, TNF- $\alpha$ , IL-2 | No information                |
| Barati           | 2010   | medical and surgical | Iran        | 95  | 58   | 62        | 55   | CRP, sTREM-1                               | No information                |
| Battista         | 2016   | ---                  | Italy       | 90  | ---  | ---       | 71   | copeptin, PCT                              | SSS                           |
| Bell             | 2003   | medical and surgical | Australia   | 83  | 61   | 66        | 75   | PCT, CRP                                   | No information                |
| Beqja-Lika       | 2013   | ---                  | Albania     | 99  | 44   | 45        | 61   | PCT, CRP                                   | No information                |
| Carpio           | 2015   | medical and surgical | Peru        | 123 | 67   | 46        | 93   | presepsin                                  | SSS                           |
| Castelli         | 2004   | medical and surgical | Italy       | 49  | 59   | 64        | 69   | PCT, CRP                                   | SSS                           |
| Clec'h           | 2006   | surgical             | France      | 67  | 63   | 66        | 46   | PCT                                        | septic shock                  |
| Clec'h           | 2006   | medical              | France      | 76  | 60   | 61        | 47   | PCT                                        | septic shock                  |
| de Pablo         | 2013   | medical and surgical | Spain       | 92  | 62   | 67        | 57   | sICAM-1                                    | No information                |
| Dorizzi          | 2006   | medical and surgical | Italy       | 83  | 66   | 61        | 61   | PCT                                        | SSS                           |
| Du               | 2003   | medical and surgical | China       | 51  | 65   | 61        | 39   | PCT, CRP, IL-6                             | SSS                           |
| Endo             | 2012   | medical and surgical | Japan       | 185 | 71   | 59        | 62   | PCT, IL-6, presepsin                       | No information                |
| Farag            | 2013   | medical and surgical | Egypt       | 30  | 52   | 33        | 50   | CRP, Leptin                                | No information                |
| Feng             | 2012   | medical and surgical | China       | 132 | 57   | 64        | 77   | PCT, CRP, sCD163                           | Sepsis, severe sepsis         |
| Gaini            | 2006   | medical              | Denmark     | 93  | 63   | 48        | 80   | PCT, CRP, IL-6, LBP                        | SSS                           |
| Garnacho-Montero | 2014   | medical and surgical | Spain       | 160 | 63   | 51        | 64   | PCT, CRP, cf-DNA                           | "severe sepsis, septic shock" |
| Gerrits          | 2013   | ---                  | Netherland  | 44  | 72   | 48        | 57   | CRP, CD64                                  | SSS                           |
| Giamarellos      | 2008   | surgical             | Greece      | 69  | 52   |           | 62   | sTREM-1                                    | SSS                           |
| Gibot            | 2004   | medical              | France      | 76  | 60   | 71        | 62   | PCT, CRP, sTREM-1                          | SSS                           |
| Godnic           | 2015   | surgical             | Slovenia    | 47  | ---  | ---       | 85   | PCT, CRP, CD64, presepsin                  | SSS                           |
| Guyen            | 2002   | ---                  | Turkey      | 34  | 56   | 59        | 56   | PCT, CRP                                   | No information                |
| Han              | 2016   | medical and surgical | China       | 198 | 59   | 69        | 52   | miR-143                                    | SSS                           |
| Harbarth         | 2001   | medical and surgical | Switzerland | 78  | 54   | 73        | 77   | PCT, IL-6, IL-8                            | SSS                           |

|               |      |                      |             |     |    |    |    |                                       |                             |
|---------------|------|----------------------|-------------|-----|----|----|----|---------------------------------------|-----------------------------|
| Hoenigl       | 2013 | medical and surgical | Austria     | 132 | 67 | 50 | 42 | suPAR                                 | No information              |
| Hou           | 2012 | surgical             | China       | 67  | 58 |    | 36 | DcR3                                  | No information              |
| Hou           | 2016 | medical              | China       | 67  | 56 | 61 | 34 | cf-DNA,IL-6 ,PCT                      | No information              |
| Hsu           | 2011 | respiratory          | Taiwan      | 66  | 69 | 77 | 83 | PCT, CD64, CD64/CD16                  | Severe sepsis, septic shock |
| Ishikura      | 2014 | medical and surgical | Japan       | 82  | 67 | 54 | 52 | presepsin, Protein C                  | SSS                         |
| Ivancevic     | 2008 | surgical             | Serbia      | 63  | 55 | 70 | 65 | PCT                                   | No information              |
| Jekarl        | 2013 | medical and surgical | South Korea | 177 | 52 | 50 | 44 | PCT, CRP, IL-6                        | SSS                         |
| Jekarl        | 2014 | ---                  | Seoul       | 127 | 59 | 46 | 76 | PCT, CRP, IL-6                        | SSS                         |
| Jiang         | 2015 | surgical             | China       | 64  | 53 | 59 | 59 | sCD22, PCT, IL-6                      | SSS                         |
| Kim           | 2012 | medical and surgical | USA         | 48  | 55 | 65 | 52 | DcR3                                  | No information              |
| Kofoed        | 2007 | medical              | Denmark     | 151 | 56 | 48 | 64 | PCT, CRP, sTREM-1, SuPAR, MIF         | No information              |
| Latour-Perez  | 2010 | medical and surgical | Spain       | 114 | 69 | 61 | 63 | PCT, CRP, sTREM-1                     | SSS                         |
| Lewis         | 2015 | ---                  | UK          | 103 | 57 | 60 | 81 | CD11C, CD64, CRP                      | No information              |
| Li            | 2013 | surgical             | China       | 52  | 56 | 77 | 73 | PCT, IL-6, sTREM-1, TNF- $\alpha$     | SSS                         |
| Lin A         | 2015 | medical              | China       | 159 | 56 | 79 | 60 | IL-6, PCT                             | SSS                         |
| Lin B         | 2015 | medical              | China       | 74  | 56 | 77 | 51 | IL-6, PCT                             | SSS                         |
| Matera        | 2013 | medical and surgical | Italy       | 52  | 64 | 75 | 54 | PCT, CRP, IL-10, sCD25, IFN- $\gamma$ | No information              |
| Mat-Nor       | 2016 | medical and surgical | Malaysia    | 239 | 47 | 70 | 69 | PCT,IL-6                              | SSS                         |
| Mearelli      | 2014 | medical              | Italy       | 80  | 83 | 55 | 75 | PCT, IP-10, PLA2-II, Ang 2            | No information              |
| Meynaar       | 2011 | medical and surgical | Netherlands | 76  | 66 |    | 42 | PCT, CRP, IL-6, LBP                   | SSS                         |
| Miglietta     | 2015 | medical and surgical | Italy       | 112 | 62 | 55 | 63 | PCT, CRP                              | No information              |
| Miller        | 1999 | surgical             | USA         | 35  | 43 | 71 | 83 | CRP                                   | No information              |
| Muthiah       | 2007 | medical and surgical | Australia   | 130 | 64 | 51 | 29 | PCT                                   | Severe sepsis, septic shock |
| Naeini        | 2006 | medical and surgical | Iran        | 50  | 56 | 64 | 50 | PCT                                   | SSS                         |
| Oshita        | 2010 | ---                  | Japan       | 168 | 74 | 68 | 67 | PCT,CRP                               | No information              |
| Papadimitriou | 2015 | medical and surgical | Spain       | 66  | 50 | 53 | 44 | CD64, CRP                             | No information              |
| Ratzinger     | 2013 | medical and surgical | Austria     | 298 | 58 | 58 | 72 | LBP                                   | No information              |
| Reichsoellner | 2014 | medical              | Austria     | 159 | 66 | 51 | 69 | PCT                                   | No information              |
| Righi         | 2014 | medical and surgical | Italy       | 93  | 59 | 77 | 66 | CRP, CD64                             | SSS                         |
| Rivera-Chavez | 2009 | surgical             | USA         | 93  | 35 | 75 | 60 | sTREM-1                               | SSS                         |
| Rogina        | 2014 | ---                  | Slovenia    | 88  | 64 | 50 | 47 | PCT, CRP, CD64                        | SSS                         |
| Romualdo      | 2014 | medical and surgical | Spain       | 226 | 68 | 58 | 16 | PCT, CRP, presepsin                   | No information              |
| Ruiz-Alvarez  | 2009 | medical and surgical | Spain       | 103 | 67 | 73 | 76 | PCT, CRP, C2, MBL                     | SSS                         |

|              |      |                      |              |     |      |     |    |                               |                             |
|--------------|------|----------------------|--------------|-----|------|-----|----|-------------------------------|-----------------------------|
| Sakr         | 2008 | surgical             | Germany      | 327 | 63   | 63  | 36 | PCT, CRP, IL-6, LBP           | SSS                         |
| Scherpereel  | 2006 | medical and surgical | Switzerland  | 70  | 54   | 59  | 90 | Endocan                       | SSS                         |
| Schulte      | 2011 | medical and surgical | Switzerland  | 78  | 60   | 51  | 54 | PCT, CRP, Peroxiredoxin4      | SSS                         |
| Selberg      | 2000 | medical              | Germany      | 33  | 48   | 61  | 67 | PCT, CRP, IL-6, C3a, Elastase | SSS                         |
| Seok         | 2012 | medical              | Korea        | 165 | 63   | 55  | 73 | CRP                           | SSS                         |
| Shozushima   | 2011 | medical and surgical | Japan        | 41  | 62   | 61  | 71 | presepsin                     | SSS                         |
| Sierra       | 2004 | medical and surgical | Spain        | 125 | 49   | 84  | 56 | CRP                           | SSS                         |
| Su           | 2012 | medical and surgical | China        | 144 | 55   | 64  | 58 | CRP                           | No information              |
| Su           | 2013 | medical and surgical | China        | 130 | 57   | 63  | 77 | PCT, sTREM-1                  | SSS                         |
| Sungurtekin  | 2006 | medical and surgical | Turkey       | 99  | 59   |     | 41 | CRP, C3, C4                   | No information              |
| Suprin       | 2000 | medical and surgical | France       | 95  | 57   | 65  | 79 | PCT, CRP                      | SSS                         |
| Takahashi    | 2014 | medical and surgical | Japan        | 456 | 77   | 58  | 79 | PCT, CRP, IL-6, Presepsin     | SSS                         |
| Talebi-Taher | 2014 | ---                  | Iran         | 100 | 76   | 49  | 50 | PCT, CRP, IL-6                | No information              |
| Tan          | 2016 | medical and surgical | Malaysia     | 51  | 54   | 54  | 82 | CD64, sPLA2-IIA               | No information              |
| Tian         | 2014 | neurological         | China        | 104 | 54   | 64  | 54 | PCT, CRP                      | SSS                         |
| Tromp        | 2012 | medical              | Netherland   | 342 | 59   | 57  | 16 | PCT, CRP, IL-6, LBP           | No information              |
| Tsalik       | 2012 | medical and surgical | USA          | 336 | 52   | 52  | 74 | PCT, CRP, IL-6                | SSS                         |
| Tsangaris    | 2009 | medical and surgical | Greece       | 50  | 63   | 76  | 54 | PCT                           | SSS                         |
| Tugrul       | 2002 | medical and surgical | Turkey       | 85  | 45   | 46  | 88 | PCT, CRP                      | SSS                         |
| Ulla         | 2013 | medical and surgical | Italy        | 189 | 64   | 61  | 56 | PCT, presepsin                | SSS                         |
| Vaschetto    | 2008 | unclear              | Italy        | 56  | 50   | 77  | 48 | osteopontin                   | Severe sepsis, septic shock |
| Vodnik       | 2013 | surgical             | Serbia       | 60  | 54.4 | 58  | 50 | Presepsin                     | No information              |
| Wang         | 2012 | medical and surgical | China        | 198 | 60   | 70  | 84 | miR-15a                       | No information              |
| Wang         | 2013 | ---                  | China        | 18  | ---  | --- | 56 | miR-146a                      | No information              |
| Wanner       | 2000 | surgical             | Switzerland. | 133 | 40   | 74  | 34 | PCT                           | No information              |
| Xiao         | 2015 | medical and surgical | China        | 277 | 50   | 49  | 69 | AGP,CRP,PCT                   | SSS                         |
| Yousef       | 2010 | medical and surgical | Egypt        | 74  | 44   | 53  | 54 | leptin                        | SSS                         |

SSS: Sepsis, severe sepsis and septic shock; NA, not available.
