# Supplementary material for: Biomarkers for diagnosis of sepsis in patients with systemic inflammatory response syndrome: a systematic review and meta-analysis
Source: PubMed Central journal article supplement (PMC5153391; doi:10.1186/s40064-016-3591-5), 2016-12-12
Supplement: 40064_2016_3591_MOESM2_ESM.pdf [file 40064_2016_3591_MOESM2_ESM.pdf]

**S2: The quality assessment of the included studies by QUADAS (Diagnostic Accuracy included in Systematic Reviews).**

| Reference   | year | 1. Patient spectrum | 2. Selection criteria | 3. Reference standard | 4. Disease progression bias | 5. Partial verification bias | 6. Differential verification bias | 7. Incorporation | 8. Description of index test | 9. Description of reference standard | 10. Test review bias | 11. Diagnostic review bias | 13. Uninterpretable results | 14. Withdrawals |
|-------------|------|---------------------|-----------------------|-----------------------|-----------------------------|------------------------------|-----------------------------------|------------------|------------------------------|--------------------------------------|----------------------|----------------------------|-----------------------------|-----------------|
| Abidi       | 2008 | no                  | yes                   | yes                   | yes                         | yes                          | yes                               | yes              | yes                          | yes                                  | unclear              | yes                        | unclear                     | unclear         |
| Ahmadinejad | 2009 | yes                 | yes                   | yes                   | yes                         | yes                          | yes                               | yes              | yes                          | yes                                  | yes                  | yes                        | unclear                     | yes             |
| Al-Nawas    | 1996 | unclear             | yes                   | yes                   | yes                         | yes                          | yes                               | yes              | yes                          | yes                                  | unclear              | unclear                    | unclear                     | unclear         |
| Anand       | 2015 | unclear             | yes                   | yes                   | yes                         | yes                          | yes                               | yes              | yes                          | yes                                  | unclear              | unclear                    | no                          | yes             |
| Balc        | 2003 | yes                 | yes                   | yes                   | yes                         | yes                          | yes                               | yes              | yes                          | yes                                  | unclear              | unclear                    | unclear                     | unclear         |
| Barati      | 2010 | yes                 | yes                   | yes                   | yes                         | yes                          | yes                               | yes              | yes                          | yes                                  | unclear              | yes                        | unclear                     | yes             |
| Battista    | 2016 | unclear             | no                    | yes                   | yes                         | yes                          | yes                               | yes              | yes                          | yes                                  | unclear              | unclear                    | yes                         | yes             |
| Bell        | 2003 | yes                 | yes                   | yes                   | yes                         | yes                          | yes                               | yes              | yes                          | yes                                  | unclear              | unclear                    | unclear                     | unclear         |
| Beqja-Lika  | 2013 | unclear             | yes                   | yes                   | yes                         | yes                          | yes                               | yes              | yes                          | yes                                  | unclear              | unclear                    | unclear                     | unclear         |
| Carpio      | 2015 | yes                 | yes                   | yes                   | yes                         | yes                          | yes                               | yes              | yes                          | yes                                  | unclear              | unclear                    | unclear                     | yes             |
| Castelli    | 2004 | no                  | yes                   | yes                   | yes                         | yes                          | yes                               | yes              | yes                          | yes                                  | yes                  | yes                        | unclear                     | unclear         |
| Clec'h      | 2006 | yes                 | yes                   | yes                   | yes                         | yes                          | yes                               | yes              | yes                          | yes                                  | unclear              | unclear                    | unclear                     | yes             |
| de Pablo    | 2013 | yes                 | yes                   | yes                   | yes                         | yes                          | yes                               | yes              | yes                          | yes                                  | unclear              | yes                        | unclear                     | unclear         |
| Dorizzi     | 2006 | yes                 | yes                   | yes                   | yes                         | yes                          | yes                               | yes              | yes                          | yes                                  | unclear              | unclear                    | unclear                     | yes             |
| Du          | 2003 | unclear             | yes                   | yes                   | yes                         | yes                          | yes                               | yes              | yes                          | yes                                  | unclear              | yes                        | unclear                     | no              |

|                            |      |         |         |     |         |     |     |     |     |     |         |         |         |         |         |
|----------------------------|------|---------|---------|-----|---------|-----|-----|-----|-----|-----|---------|---------|---------|---------|---------|
| Endo                       | 2012 | yes     | yes     | yes | yes     | yes | yes | yes | yes | yes | yes     | unclear | unclear | unclear | no      |
| Farag                      | 2013 | unclear | yes     | yes | yes     | yes | yes | yes | yes | yes | yes     | unclear | unclear | unclear | unclear |
| Feng                       | 2012 | yes     | yes     | yes | yes     | yes | yes | yes | yes | yes | yes     | unclear | unclear | unclear | yes     |
| Gaini                      | 2006 | no      | yes     | yes | yes     | yes | yes | yes | yes | yes | yes     | unclear | unclear | unclear | unclear |
| Garnacho-Mo<br>ntero       | 2014 | yes     | yes     | yes | yes     | yes | yes | yes | yes | yes | yes     | unclear | unclear | unclear | unclear |
| Gerrits                    | 2013 | no      | yes     | yes | yes     | yes | yes | yes | yes | yes | yes     | unclear | unclear | unclear | no      |
| Giamarellos-B<br>ourboulis | 2008 | no      | yes     | yes | yes     | yes | yes | yes | yes | yes | yes     | unclear | unclear | unclear | yes     |
| Gibot                      | 2004 | yes     | yes     | yes | yes     | yes | yes | yes | yes | yes | yes     | unclear | yes     | yes     | yes     |
| Godnic                     | 2015 | no      | yes     | yes | yes     | yes | yes | yes | yes | yes | yes     | no      | no      | yes     | yes     |
| Guyen                      | 2002 | unclear | yes     | yes | yes     | yes | yes | yes | yes | yes | yes     | unclear | yes     | unclear | unclear |
| Han                        | 2016 | yes     | yes     | yes | yes     | yes | yes | yes | yes | yes | yes     | unclear | unclear | yes     | yes     |
| Harbarth                   | 2001 | yes     | yes     | yes | yes     | yes | yes | yes | yes | yes | yes     | yes     | yes     | unclear | yes     |
| Hoenigl                    | 2013 | unclear | yes     | yes | yes     | yes | yes | yes | yes | yes | yes     | unclear | unclear | unclear | unclear |
| Hou                        | 2012 | no      | yes     | yes | unclear | yes | yes | yes | yes | yes | unclear | unclear | unclear | unclear | yes     |
| Hou                        | 2016 | no      | yes     | yes | yes     | yes | yes | yes | yes | yes | yes     | no      | no      | yes     | yes     |
| Hsu                        | 2011 | no      | yes     | yes | yes     | yes | yes | yes | yes | yes | yes     | yes     | yes     | unclear | yes     |
| Ishikura                   | 2014 | yes     | yes     | yes | yes     | yes | yes | yes | yes | yes | yes     | unclear | unclear | unclear | yes     |
| Ivancevic                  | 2008 | no      | yes     | yes | yes     | yes | yes | yes | yes | yes | yes     | unclear | unclear | unclear | yes     |
| Jekarl                     | 2013 | yes     | yes     | yes | yes     | yes | yes | yes | yes | yes | yes     | unclear | unclear | unclear | yes     |
| Jekarl                     | 2014 | yes     | yes     | yes | yes     | yes | yes | yes | yes | yes | yes     | unclear | unclear | no      | yes     |
| Jiang                      | 2015 | no      | unclear | yes | yes     | yes | yes | yes | yes | yes | yes     | unclear | unclear | no      | yes     |
| Kim                        | 2012 | yes     | yes     | yes | unclear | yes | yes | yes | yes | yes | unclear | unclear | unclear | unclear | yes     |
| Kofoed                     | 2007 | no      | yes     | yes | yes     | yes | yes | yes | yes | yes | yes     | unclear | yes     | unclear | yes     |
| Latour-Perez               | 2010 | yes     | yes     | yes | yes     | yes | yes | yes | yes | yes | yes     | unclear | yes     | unclear | unclear |

|               |      |         |         |         |     |     |     |     |     |         |         |         |         |         |         |
|---------------|------|---------|---------|---------|-----|-----|-----|-----|-----|---------|---------|---------|---------|---------|---------|
| Lewis         | 2015 | unclear | yes     | yes     | yes | yes | yes | yes | yes | yes     | yes     | unclear | yes     | yes     | yes     |
| Li            | 2013 | yes     | yes     | yes     | yes | yes | yes | yes | yes | yes     | yes     | unclear | unclear | unclear | yes     |
| Lin           | 2015 | no      | yes     | yes     | no  | yes | yes | yes | yes | yes     | yes     | unclear | unclear | no      | yes     |
| Matera        | 2013 | no      | yes     | yes     | yes | yes | yes | yes | yes | yes     | yes     | unclear | unclear | unclear | unclear |
| Mat-Nor       | 2016 | yes     | yes     | yes     | yes | yes | yes | yes | yes | yes     | yes     | unclear | yes     | unclear | yes     |
| Mearelli      | 2014 | yes     | yes     | yes     | yes | yes | yes | yes | yes | yes     | yes     | unclear | unclear | unclear | yes     |
| Meynaar       | 2011 | yes     | yes     | yes     | yes | yes | yes | yes | yes | yes     | yes     | unclear | yes     | unclear | yes     |
| Miglietta     | 2015 | unclear | yes     | yes     | yes | yes | yes | yes | yes | yes     | yes     | no      | no      | yes     | yes     |
| Miller        | 1999 | no      | yes     | yes     | yes | yes | yes | yes | yes | yes     | yes     | unclear | unclear | unclear | unclear |
| Muthiah       | 2007 | yes     | yes     | yes     | yes | yes | yes | yes | yes | yes     | yes     | yes     | yes     | unclear | yes     |
| Naeini        | 2006 | unclear | yes     | yes     | yes | yes | yes | yes | yes | yes     | yes     | unclear | unclear | unclear | no      |
| Oshita        | 2010 | unclear | yes     | yes     | yes | yes | yes | yes | yes | yes     | yes     | unclear | unclear | unclear | no      |
| Papadimitriou | 2015 | no      | unclear | unclear | yes | yes | yes | yes | yes | yes     | yes     | unclear | unclear | no      | yes     |
| Ratzinger     | 2013 | yes     | yes     | yes     | yes | yes | yes | yes | yes | yes     | yes     | unclear | unclear | unclear | no      |
| Reichsoellner | 2014 | no      | yes     | unclear | yes | yes | yes | yes | yes | unclear | unclear | unclear | unclear | unclear | yes     |
| Righi         | 2014 | yes     | yes     | yes     | no  | yes | yes | yes | yes | yes     | yes     | unclear | yes     | unclear | unclear |
| Rivera-Chavez | 2009 | no      | yes     | yes     | yes | yes | yes | yes | yes | yes     | yes     | unclear | unclear | unclear | yes     |
| Rogina        | 2014 | unclear | yes     | yes     | yes | yes | yes | yes | yes | yes     | yes     | unclear | unclear | no      | yes     |
| Romualdo      | 2014 | yes     | yes     | yes     | yes | yes | yes | yes | yes | yes     | yes     | unclear | unclear | unclear | yes     |
| Ruiz-Alvarez  | 2009 | yes     | yes     | yes     | yes | yes | yes | yes | yes | yes     | yes     | unclear | yes     | unclear | yes     |
| Sakr          | 2008 | yes00%  | yes     | yes     | yes | yes | yes | yes | yes | yes     | yes     | unclear | unclear | unclear | unclear |
| Scherpereel   | 2006 | unclear | unclear | yes     | yes | yes | yes | yes | yes | yes     | yes     | unclear | unclear | unclear | yes     |
| Schulte       | 2011 | yes     | yes     | yes     | yes | yes | yes | yes | yes | yes     | yes     | unclear | yes     | no      | no      |
| Selberg       | 2000 | no      | yes     | yes     | yes | yes | yes | yes | yes | yes     | yes     | unclear | unclear | unclear | unclear |
| Seok          | 2012 | no      | yes     | yes     | yes | yes | yes | yes | yes | yes     | yes     | unclear | unclear | unclear | yes     |
| Shozushima    | 2011 | yes     | yes     | yes     | yes | yes | yes | yes | yes | yes     | yes     | unclear | unclear | unclear | yes     |

|              |      |         |         |         |         |     |     |     |     |     |     |         |         |         |         |
|--------------|------|---------|---------|---------|---------|-----|-----|-----|-----|-----|-----|---------|---------|---------|---------|
| Sierra       | 2004 | yes     | yes     | yes     | yes     | yes | yes | yes | yes | yes | yes | unclear | unclear | unclear | unclear |
| Su           | 2012 | yes     | yes     | yes     | yes     | yes | yes | yes | yes | yes | yes | unclear | yes     | unclear | yes     |
| Su           | 2013 | yes     | yes     | yes     | yes     | yes | yes | yes | yes | yes | yes | yes     | unclear | unclear | unclear |
| Sungurtekin  | 2006 | unclear | unclear | yes     | yes     | yes | yes | yes | yes | yes | yes | yes     | yes     | unclear | yes     |
| Suprin       | 2000 | yes     | yes     | yes     | yes     | yes | yes | yes | yes | yes | yes | unclear | unclear | unclear | yes     |
| Takahashi    | 2014 | yes     | yes     | yes     | yes     | yes | yes | yes | yes | yes | yes | unclear | unclear | yes     | unclear |
| Talebi-Taher | 2014 | unclear | yes     | yes     | yes     | yes | yes | yes | yes | yes | yes | unclear | unclear | no      | yes     |
| Tan          | 2016 | no      | yes     | yes     | yes     | yes | yes | yes | yes | yes | yes | no      | no      | yes     | yes     |
| Tian         | 2014 | no      | yes     | yes     | yes     | yes | yes | yes | yes | yes | yes | unclear | unclear | unclear | unclear |
| Tromp        | 2012 | no      | yes     | yes     | yes     | yes | yes | yes | yes | yes | yes | unclear | unclear | unclear | yes     |
| Tsalik       | 2012 | unclear | yes     | yes     | yes     | yes | yes | yes | yes | yes | yes | unclear | yes     | no      | yes     |
| Tsangaris    | 2009 | yes     | yes     | yes     | yes     | yes | yes | yes | yes | yes | yes | unclear | yes     | unclear | yes     |
| Tugrul       | 2002 | yes     | yes     | yes     | yes     | yes | yes | yes | yes | yes | yes | unclear | unclear | unclear | no      |
| Ulla         | 2013 | yes     | yes     | yes     | yes     | yes | yes | yes | yes | yes | yes | yes     | unclear | unclear | yes     |
| Vaschetto    | 2008 | unclear | unclear | yes     | yes     | yes | yes | yes | yes | yes | yes | yes     | yes     | unclear | yes     |
| Vodnik       | 2013 | no      | yes     | yes     | yes     | yes | yes | yes | yes | yes | yes | unclear | unclear | unclear | unclear |
| Wang         | 2012 | yes     | yes     | yes     | yes     | yes | yes | yes | yes | yes | yes | unclear | unclear | unclear | yes     |
| Wang         | 2013 | no      | unclear | unclear | unclear | yes | yes | yes | yes | yes | yes | unclear | unclear | unclear | unclear |
| Wanner       | 2000 | no      | yes     | yes     | yes     | yes | yes | yes | yes | yes | yes | unclear | unclear | unclear | unclear |
| Xiao         | 2015 | yes     | yes     | yes     | yes     | yes | yes | yes | yes | yes | yes | unclear | yes     | unclear | yes     |
| Yousef       | 2010 | yes     | yes     | yes     | yes     | yes | yes | yes | yes | yes | yes | unclear | unclear | unclear | yes     |
