# Supplementary material for: Biomarkers for diagnosis of sepsis in patients with systemic inflammatory response syndrome: a systematic review and meta-analysis
Source: PubMed Central journal article supplement (PMC5153391; doi:10.1186/s40064-016-3591-5), 2016-12-12

# S3. Forest plots of biomarkers for diagnosis of sepsis

## PCT

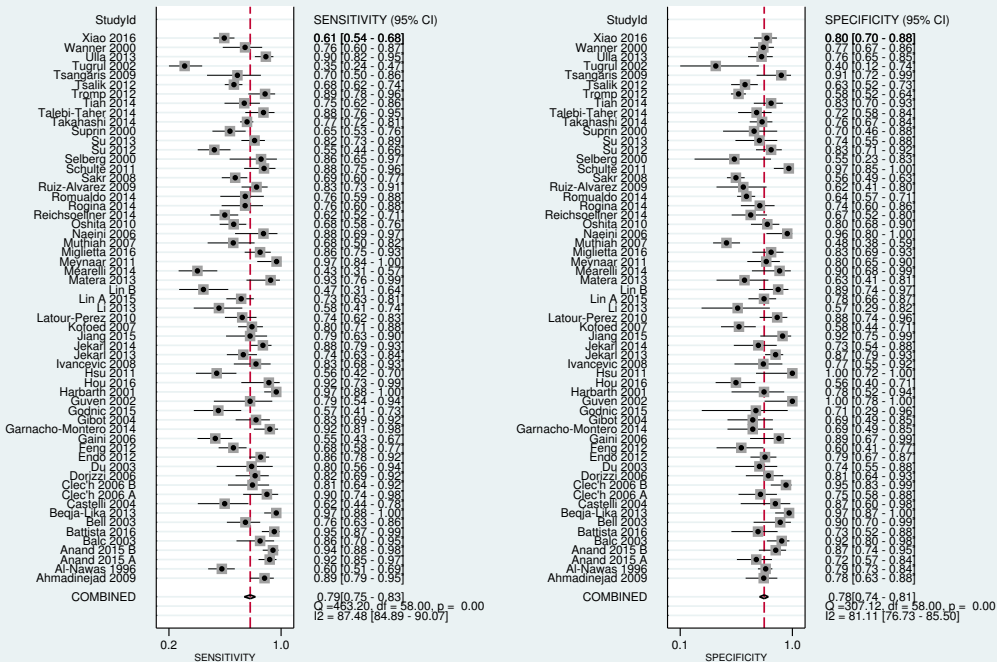

# CRP

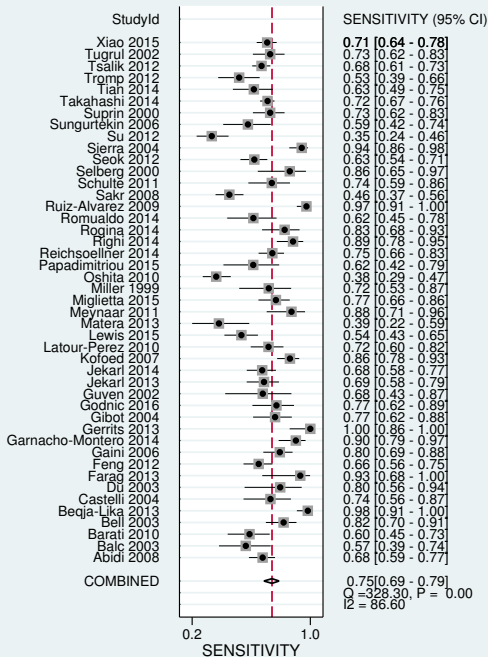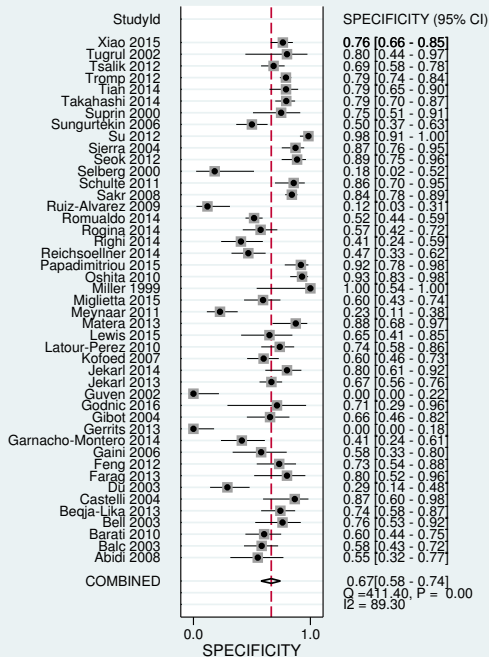

## IL-6

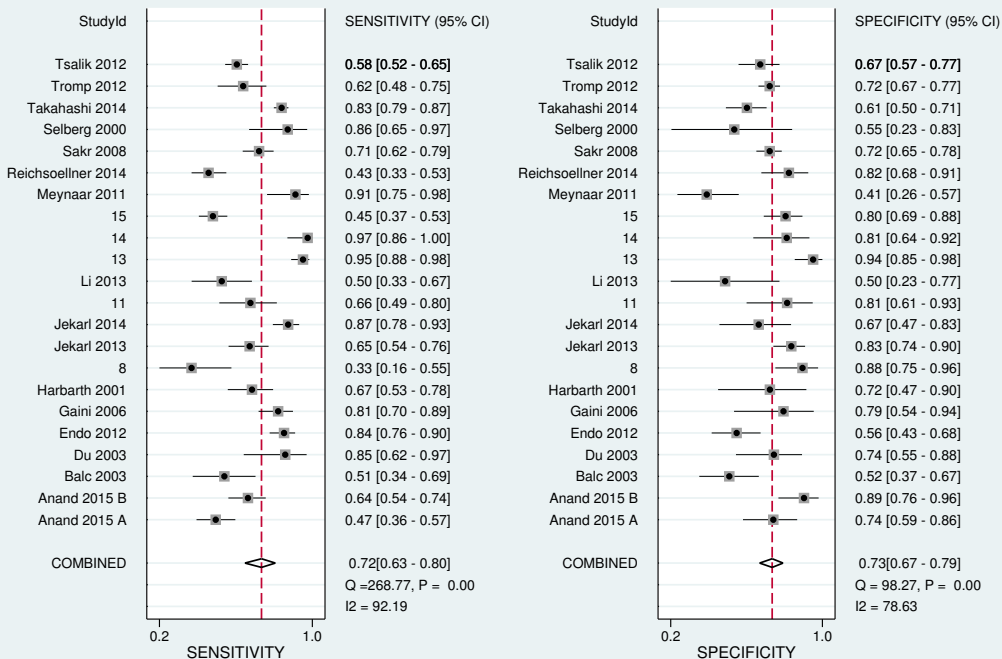

# Presepsin

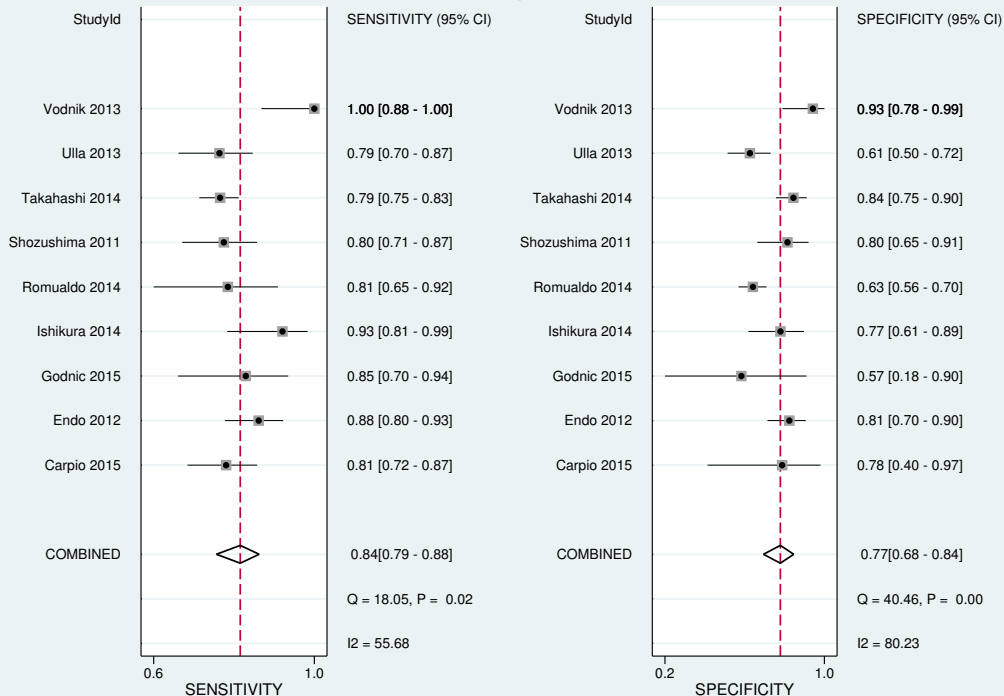

# sTREM-1

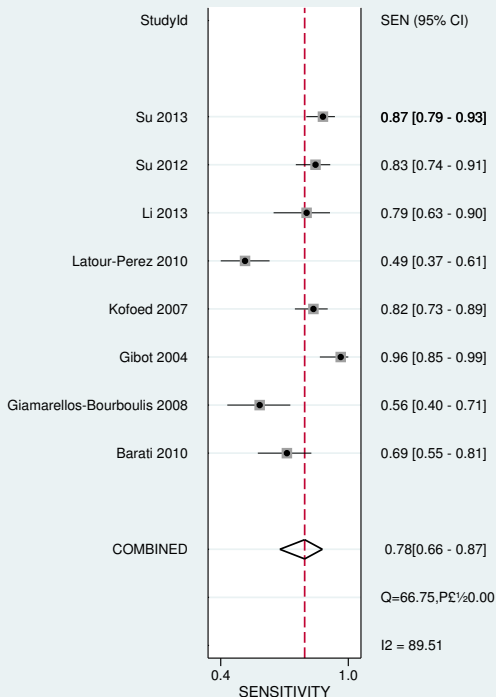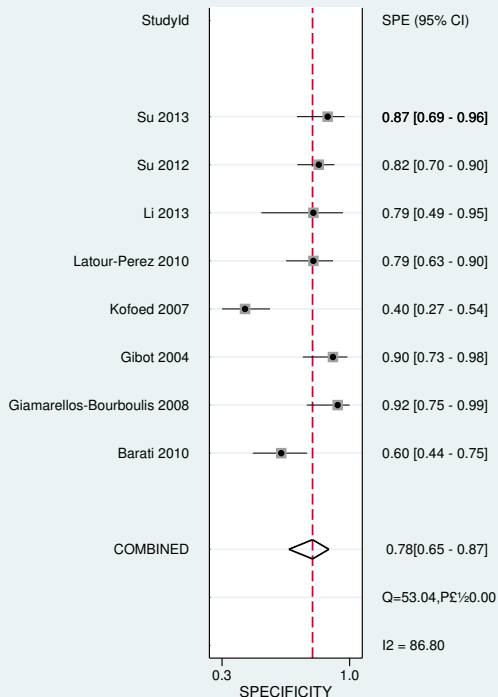

# LBP

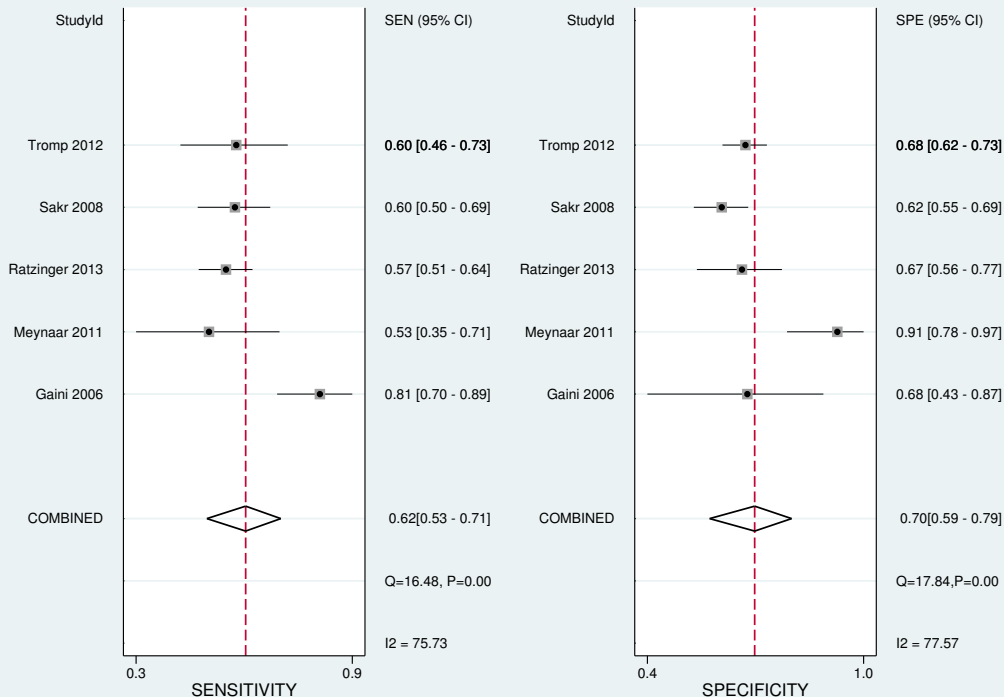

# CD64

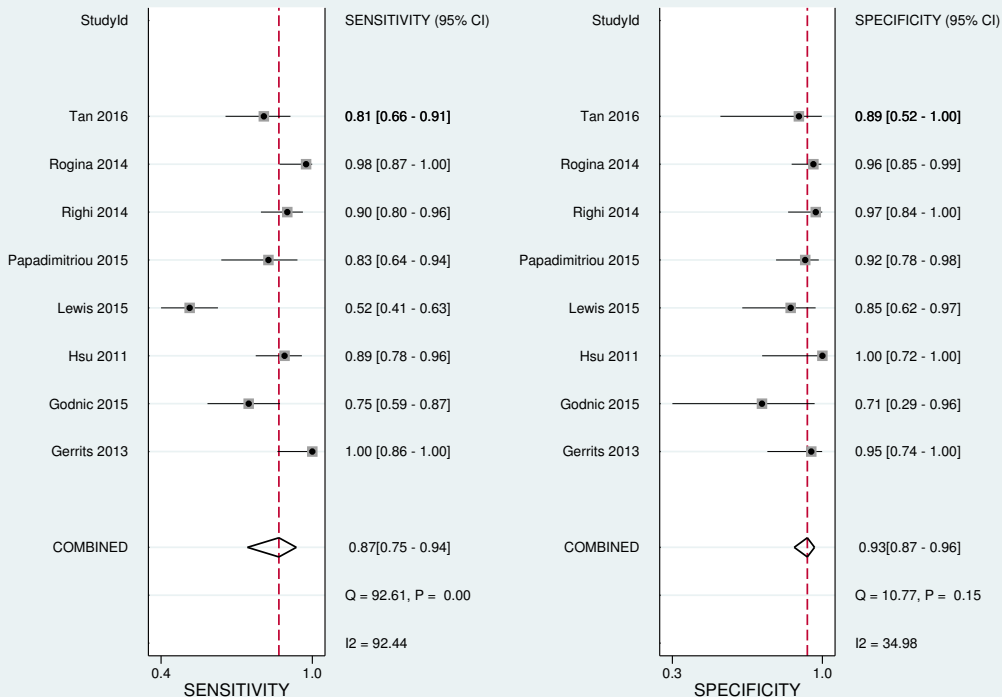

Supplement: 40064_2016_3591_MOESM3_ESM.pdf [file 40064_2016_3591_MOESM3_ESM.pdf]
